# Supplementary material for: Liquid metal core–shell structures functionalised via mechanical agitation: the example of Field's metal
Source: Royal Society of Chemistry journal article supplement (doi:10.1039/c9ta05200c), 2019-01-01
Supplement: c9ta05200c1.pdf [file c9ta05200c1.pdf]

## Supplementary Information

### Liquid metal core-shell structures functionalised *via* mechanical agitation: the example of Field's metal†

Shuhada A. Idrus-Saidi,<sup>a</sup> Jianbo Tang,<sup>a</sup> Mohammad B. Ghasemian,<sup>a</sup> Jiong Yang,<sup>a</sup> Jialuo Han,<sup>a</sup> Nitu Syed,<sup>b</sup> Torben Daeneke,<sup>b</sup> Roozbeh Abbasi,<sup>a</sup> Pramod Koshy,<sup>c</sup> Anthony P. O'Mullane,<sup>d</sup> and Kourosh Kalantar-Zadeh\*<sup>a</sup>

<sup>a</sup>School of Chemical Engineering, University of New South Wales (UNSW), Sydney, NSW 2052, Australia

E-mail: k.kalantar-zadeh@unsw.edu.au

<sup>b</sup>School of Engineering, RMIT University, Melbourne, VIC 3000, Australia

<sup>c</sup>School of Materials Science and Engineering, University of New South Wales (UNSW), Sydney, NSW 2052, Australia

<sup>d</sup>School of Chemistry, Physics and Mechanical Engineering, Queensland University of Technology (QUT), Brisbane, QLD 4001, Australia

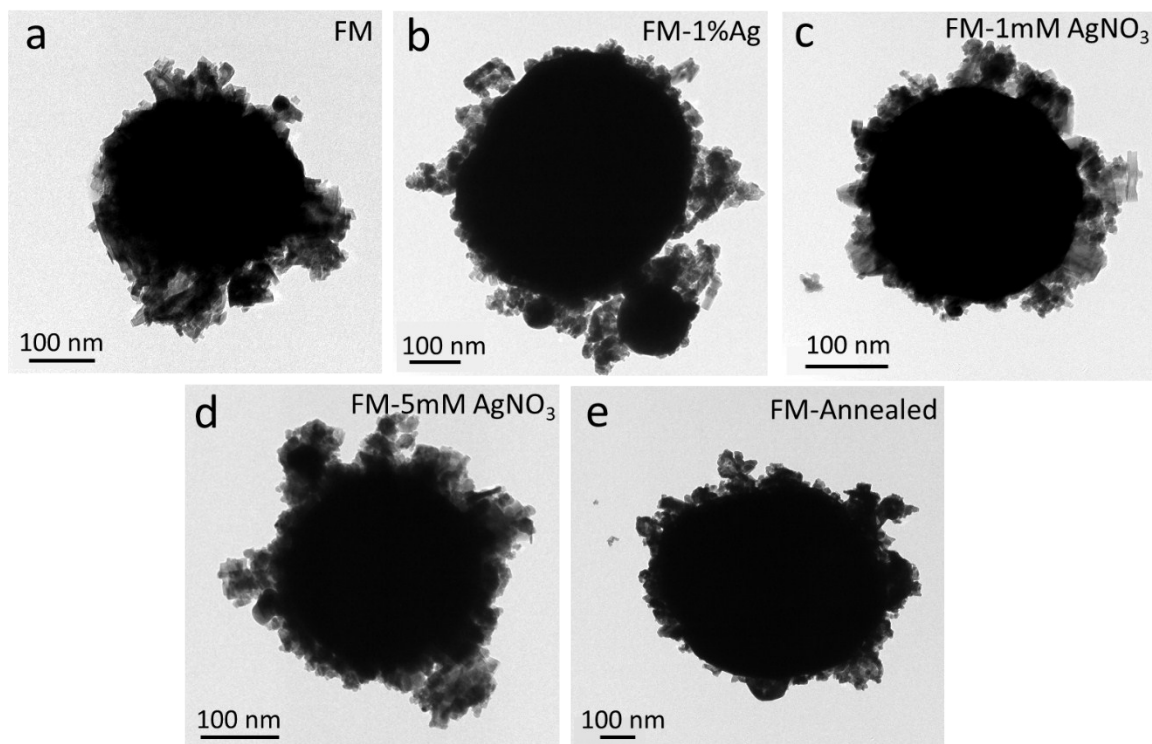

**Fig. S1** TEM images of (a) FM, (b) FM-1%Ag, (c) FM-1mM AgNO<sub>3</sub>, (d) FM-5mM AgNO<sub>3</sub> and (e) FM-Annealed.

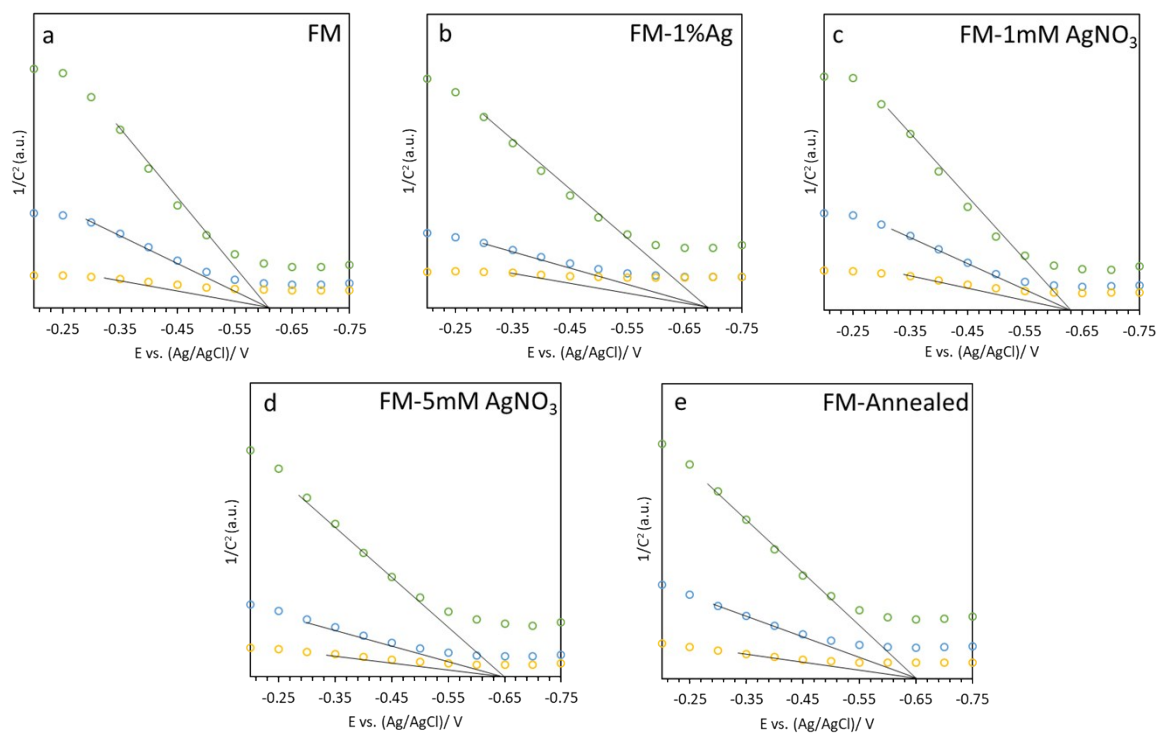

**Fig. S2** Mott-Schottky plots for (a) FM, (b) FM-1%Ag, (c) FM-1mM AgNO<sub>3</sub>, (d) FM-5mM AgNO<sub>3</sub> and (e) FM-Annealed.

**Table S1** Degradation rate of Congo red for with the presence of FM, FM-1%Ag, FM-5 mM AgNO<sub>3</sub> and FM-Annealed catalysts under solar light irradiation for 2 hours.

| Time (min) | Degradation rate of Congo red dye with the presence of photocatalysts (%) |         |                          |             |
|------------|---------------------------------------------------------------------------|---------|--------------------------|-------------|
|            | FM                                                                        | FM-1%Ag | FM-5mM AgNO <sub>3</sub> | FM-Annealed |
| 0          | 0.00                                                                      | 0.00    | 0.00                     | 0.00        |
| 20         | 7.67                                                                      | 5.81    | 12.68                    | 2.36        |
| 40         | 12.66                                                                     | 11.33   | 19.61                    | 4.86        |
| 60         | 17.04                                                                     | 17.14   | 26.85                    | 6.59        |
| 80         | 20.80                                                                     | 22.22   | 32.38                    | 10.30       |
| 100        | 24.51                                                                     | 28.70   | 37.35                    | 10.80       |
| 120        | 28.56                                                                     | 33.81   | 43.84                    | 12.80       |

**Table S2** Degradation rate of Methylene blue for with the presence of FM, FM-1%Ag, FM-1 mM AgNO<sub>3</sub>, FM-5 mM AgNO<sub>3</sub> and FM-Annealed catalysts under solar light irradiation for 2 hours.

| Time (min) | Degradation rate of methylene blue dye with the presence of photocatalysts (%) |         |                          |                          |             |
|------------|--------------------------------------------------------------------------------|---------|--------------------------|--------------------------|-------------|
|            | FM                                                                             | FM-1%Ag | FM-1mM AgNO <sub>3</sub> | FM-5mM AgNO <sub>3</sub> | FM-Annealed |
| 0          | 0.00                                                                           | 0.00    | 0.00                     | 0.00                     | 0.00        |
| 20         | 13.28                                                                          | 13.97   | 12.07                    | 12.50                    | 13.04       |
| 40         | 25.73                                                                          | 25.71   | 22.27                    | 23.66                    | 25.93       |
| 60         | 36.61                                                                          | 36.70   | 32.64                    | 34.97                    | 37.06       |
| 80         | 47.06                                                                          | 46.51   | 43.45                    | 45.28                    | 46.94       |
| 100        | 56.63                                                                          | 56.85   | 52.71                    | 54.18                    | 55.59       |
| 120        | 64.57                                                                          | 64.48   | 61.18                    | 61.54                    | 64.43       |

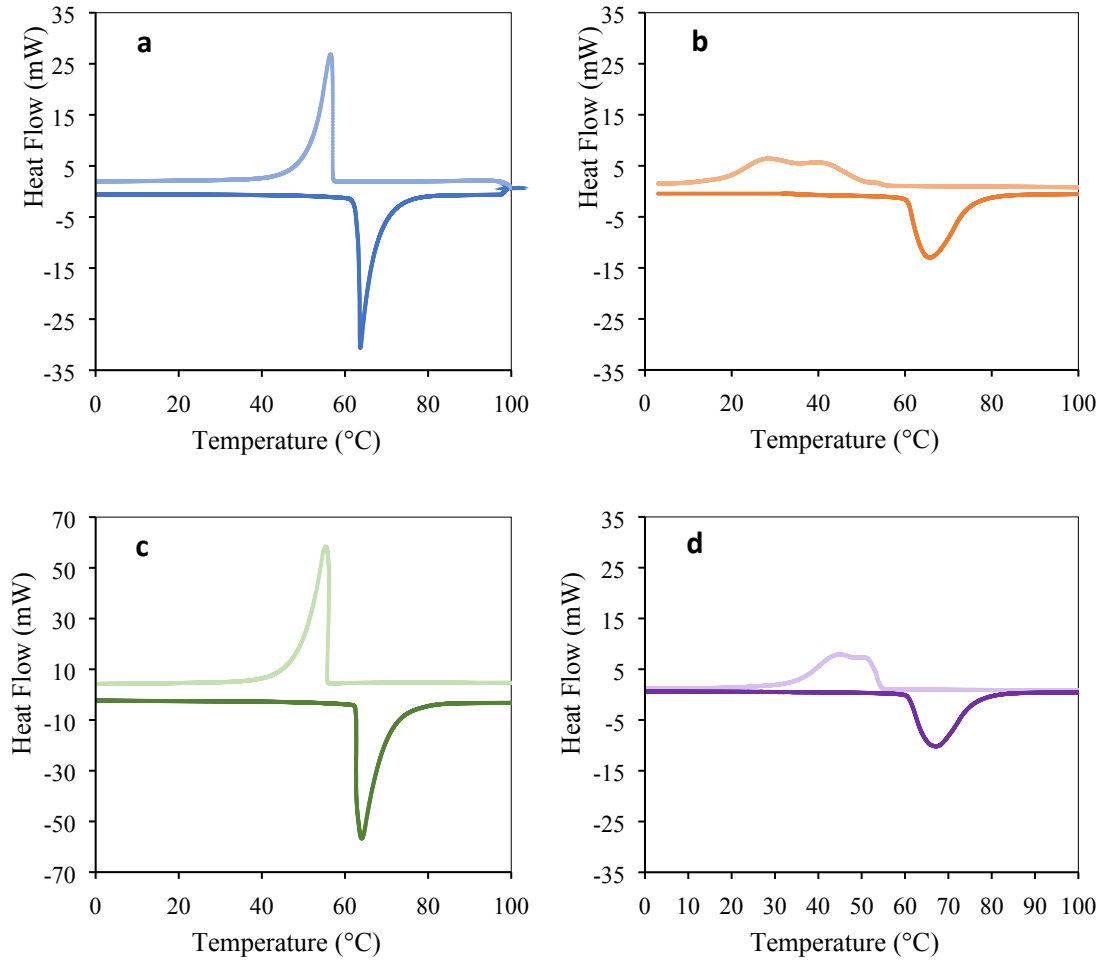

**Fig. S3** The DSC curves of (a) bulk Field's metal, (b) Field's metal particles (c) bulk Field's metal with incorporated Ag and (d) Field's metal particles with incorporated Ag that show the solidification (dotted lines) and melting (solid lines).

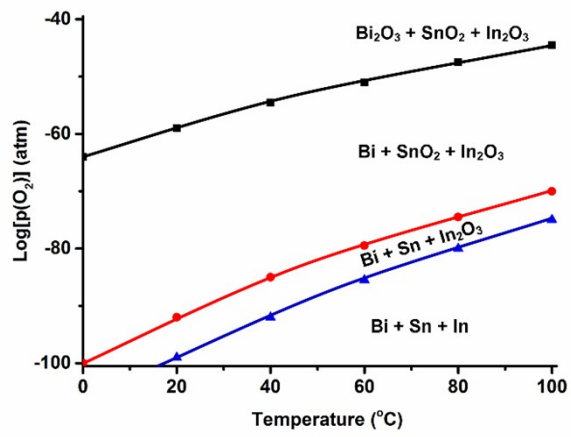

**Fig. S4** The oxidation of the Bi-Sn-In-O system under different conditions calculated using the Field's metal composition by FactSage software.<sup>1</sup>

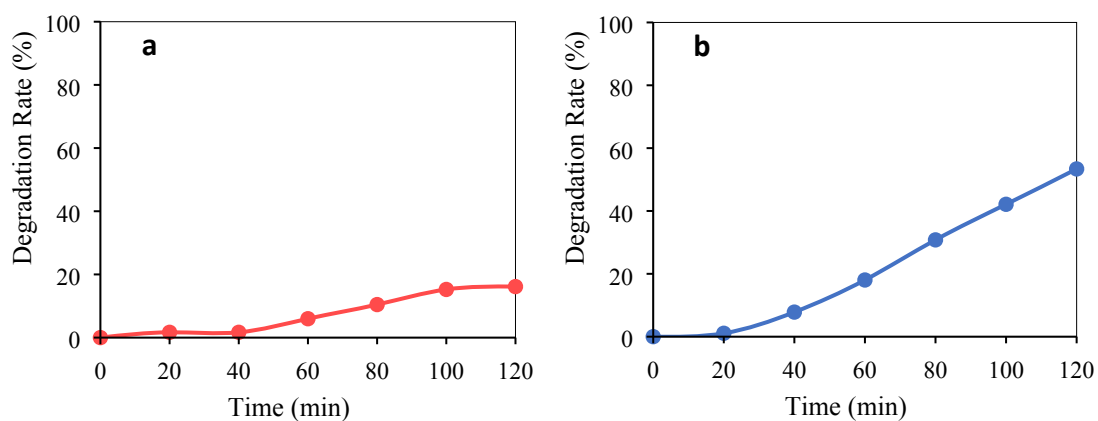

**Fig. S5** Photocatalytic activity of the Ag particles towards (a) Congo red and (b) methylene blue.

## References

1. C. W. Bale, E. Bélisle, P. Chartrand, S. A. Deckerov, G. Eriksson, A. E. Gheribi, K. Hack, I. H. Jung, Y. B. Kang, J. Melançon, A. D. Pelton, S. Petersen, C. Robelin, J. Sangster, P. Spencer and M. A. Van Ende, *Calphad*, 2016, **54**, 35.
